# Supplementary material for: Dual amyloid cross-seeding reveals steric zipper-facilitated fibrillization and pathological links between protein misfolding diseases
Source: Royal Society of Chemistry journal article supplement (doi:10.1039/d0tb02958k), 2021-01-01
Supplement: d0tb02958k1.pdf [file d0tb02958k1.pdf]

## Support Information

### **Dual Amyloid Cross-Seeding Reveals Steric Zipper-Facilitated Fibrillization and Pathological Links between Protein Misfolding Diseases**

Yanxian Zhang<sup>1</sup>ζ, Mingzhen Zhang<sup>1</sup>ζ, Yonglan Liu<sup>1</sup>ζ, Dong Zhang<sup>1</sup>, Yijing Tang<sup>1</sup>, Baiping Ren<sup>1</sup>, and Jie Zheng<sup>1</sup>\*

<sup>1</sup>Department of Chemical, Biomolecular, and Corrosion Engineering  
The University of Akron, Ohio, USA

ζ These authors contribute equally to this work.

\* Corresponding author: [zhengj@uakron.edu](mailto:zhengj@uakron.edu)

**Table S1.** Summary of amyloid cross-seeding models between GNNQQNY-A $\beta$  and between GNNQQNY-hIAPP in double-layer and triple-layer organizations. The classification of cross-seeding interface is defined by  $[\text{GYO-C}^{\text{A}\beta}]_{\uparrow\uparrow}$ ,  $[\text{GYO-N}^{\text{A}\beta}]_{\uparrow\downarrow}$ ,  $[\text{GYE-C}^{\text{A}\beta}]_{\uparrow\downarrow}$ ,  $[\text{GYE-N}^{\text{A}\beta}]_{\uparrow\downarrow}$  and  $[\text{GYO-C}^{\text{hP}}]_{\uparrow\uparrow}$ ,  $[\text{GYO-N}^{\text{hP}}]_{\uparrow\downarrow}$ ,  $[\text{GYE-C}^{\text{hP}}]_{\uparrow\downarrow}$ ,  $[\text{GYE-N}^{\text{hP}}]_{\uparrow\downarrow}$ , where the superscripted two letters represent amyloid peptide (GY=GNNQQNY, A $\beta$ =A $\beta$ , and hP=hIAPP); Capital letters of “O” and “E” represent the odd face containing G1, N3, Q5, Y7 residues and even face containing N2, Q4, N6 residues of GNNQQNY; Capital letters of “N” and “C” represent N-terminal and C-terminal  $\beta$ -sheet of A $\beta$  or hIAPP; Symbols of “ $\uparrow\uparrow$ ” and “ $\uparrow\downarrow$ ” represent parallel and antiparallel orientations between GNNQQNY and A $\beta$ /hIAPP.

| System | Interface                                                  | dx (Å) | dy (Å) | Stability |
|--------|------------------------------------------------------------|--------|--------|-----------|
| A1     | $[\text{GYO-C}^{\text{A}\beta}]_{\uparrow\downarrow}$      | -10.3  | 13.5   | stable    |
| A2     | $[\text{GYE-C}^{\text{A}\beta}]_{\uparrow\downarrow}$      | -10.4  | 14.0   | unstable  |
| A3     | $[\text{GYE-C}^{\text{A}\beta}]_{\uparrow\downarrow}$      | 3.6    | 14.9   | stable    |
| A4     | $[\text{GYE-C}^{\text{A}\beta}]_{\uparrow\uparrow}$        | -5.6   | 14.9   | stable    |
| A5     | $[\text{GYO-C}^{\text{A}\beta}]_{\uparrow\uparrow}$        | -0.6   | 13.4   | stable    |
| A6     | $[\text{GYO-C}^{\text{A}\beta}]_{\uparrow\uparrow}$        | 9.5    | 13.5   | unstable  |
| A7     | $[\text{GYE-C}^{\text{A}\beta}]_{\uparrow\uparrow}$        | 11.3   | 14.9   | unstable  |
| A8     | $[\text{GYO-N}^{\text{A}\beta}]_{\uparrow\downarrow}$      | -9.4   | -14.5  | unstable  |
| A9     | $[\text{GYE-N}^{\text{A}\beta}]_{\uparrow\downarrow}$      | -9.1   | -14.9  | unstable  |
| A10    | $[\text{GYO-N}^{\text{A}\beta}]_{\uparrow\uparrow}$        | 11.1   | -14.9  | stable    |
| A11    | $[\text{GYE-N}^{\text{A}\beta}]_{\uparrow\uparrow}$        | 13.0   | -14.5  | unstable  |
| H1     | $[\text{GYE-C}^{\text{hP}}]_{\uparrow\downarrow}$          | -14.8  | -14.4  | stable    |
| H2     | $[\text{GYO-C}^{\text{hP}}]_{\uparrow\downarrow}$          | -13.9  | -14.1  | stable    |
| H3     | $[\text{GYO-C}^{\text{hP}}]_{\uparrow\downarrow}$          | -4.9   | -15.0  | stable    |
| H4     | $[\text{GYE-C}^{\text{hP}}]_{\uparrow\downarrow}$          | -3.9   | -16.2  | stable    |
| H5     | $[\text{GYO-C}^{\text{hP}}]_{\uparrow\downarrow}$          | 9.3    | -13.9  | unstable  |
| H6     | $[\text{GYE-C}^{\text{hP}}]_{\uparrow\downarrow}$          | 12.1   | -14.2  | unstable  |
| H7     | $[\text{GYE-C}^{\text{hP}}]_{\uparrow\uparrow}$            | -21.3  | -16.2  | stable    |
| H8     | $[\text{GYE-C}^{\text{hP}}]_{\uparrow\uparrow}$            | -9.3   | -15.3  | stable    |
| H9     | $[\text{GYO-C}^{\text{hP}}]_{\uparrow\uparrow}$            | -7.2   | -15.0  | stable    |
| H10    | $[\text{GYO-C}^{\text{hP}}]_{\uparrow\uparrow}$            | 2.8    | -15.0  | unstable  |
| H11    | $[\text{GYE-N}^{\text{hP}}]_{\uparrow\downarrow}$          | -4.1   | 13.1   | unstable  |
| H12    | $[\text{GYO-N}^{\text{hP}}]_{\uparrow\downarrow}$          | -3.3   | 11.9   | unstable  |
| H13    | $[\text{GYE-N}^{\text{hP}}]_{\uparrow\downarrow}$          | 9.8    | 13.2   | stable    |
| H14    | $[\text{GYE-N}^{\text{hP}}]_{\uparrow\uparrow}$            | 5.1    | 13.2   | unstable  |
| AGA1   | $[\text{A}\beta\text{C-O}^{\text{GYE-N}^{\text{A}\beta}}]$ | -      | -      | stable    |
| AGA2   | $[\text{A}\beta\text{C-O}^{\text{GYE-C}^{\text{A}\beta}}]$ | -      | -      | unstable  |
| HGH1   | $[\text{hP}\text{N-E}^{\text{GYO-C}^{\text{hP}}}]$         | -      | -      | stable    |
| HGH2   | $[\text{hP}\text{C-E}^{\text{GYO-C}^{\text{hP}}}]$         | -      | -      | unstable  |

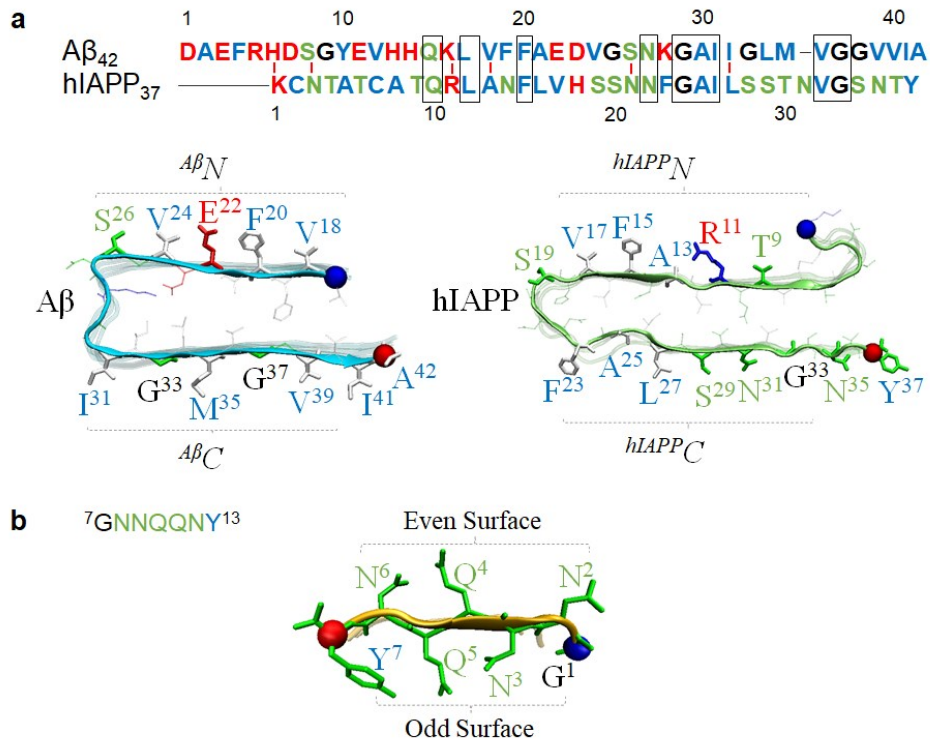

**Figure S1.** (a) Sequence and structural comparison between A $\beta$  and hIAPP. Short red lines and black boxes indicate similar and same sequences between A $\beta$  and hIAPP, respectively. (b) Sequence and structure of GNNQQNY. Three crystal fibrillar structures of A $\beta$ , hIAPP, and GNNQQNY exhibit typical  $\beta$ -sheet structures, which provide a possible structural motif for amyloid cross-seeding between them. Color ID: charged residues in red, polar residues in green, and hydrophobic residues in blue.

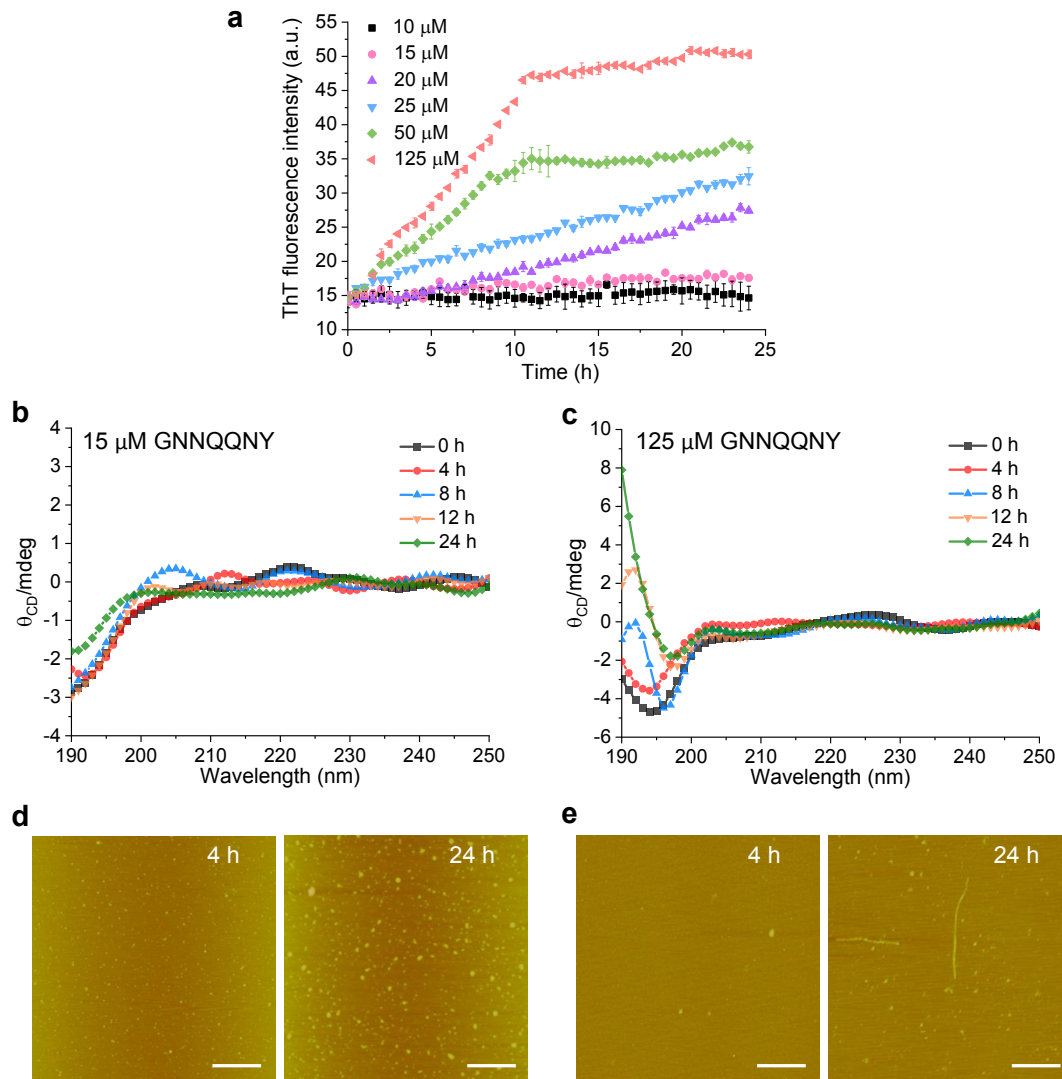

**Figure S2.** Concentration-dependent amyloidogenic property of GNNQQNY. **(a)** Time-dependent ThT fluorescence curves to monitor the aggregation kinetics of pure GNNQQNY at different concentrations of 10-125  $\mu$ M. Self-aggregation of **(b, d)** 15  $\mu$ M and **(c, e)** 125  $\mu$ M GNNQQNY as monitored by **(b, c)** time-dependent far-UV CD spectra and **(d, e)** AFM images at 4 and 24 h.

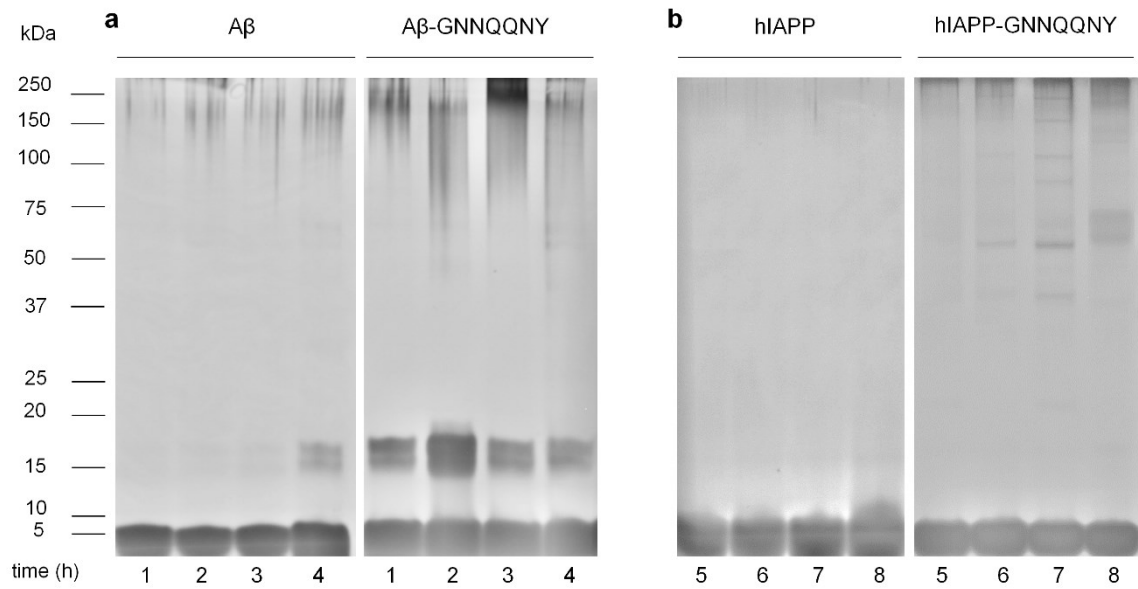

**Figure S3. Characterization of pure and cross-seeding amyloid aggregates by SDS-PAGE.** SDS-PAGE bands of (a) pure A $\beta$  (15  $\mu$ M) and cross-seeding A $\beta$ -GNNQQNY (15  $\mu$ M:15  $\mu$ M) aggregates within 1-4 h and (b) pure hIAPP (15  $\mu$ M) and cross-seeding hIAPP-GNNQQNY (15  $\mu$ M:15  $\mu$ M) aggregates within 5-8 h.

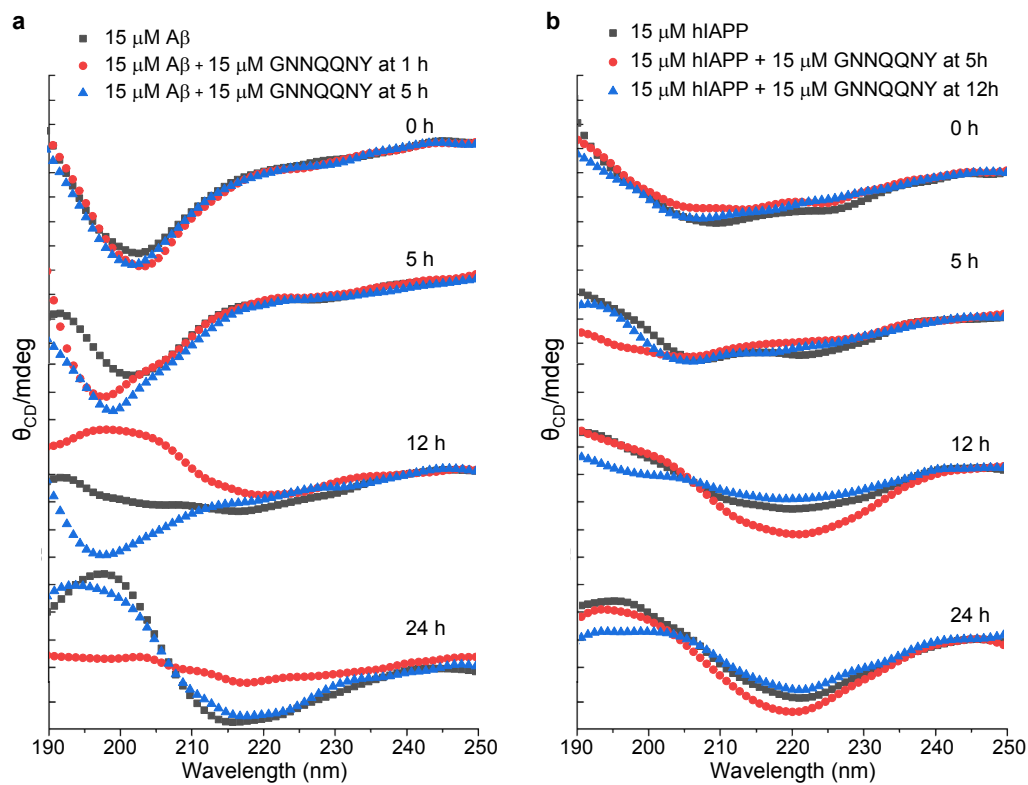

**Figure S4.** Time-dependent circular dichroism spectra for monitoring the secondary structure changes by adding GNNQQNY (15  $\mu\text{M}$ ) to **(a)** A $\beta$  (15  $\mu\text{M}$ ) and **(b)** hIAPP (15  $\mu\text{M}$ ) seeds at different time points.

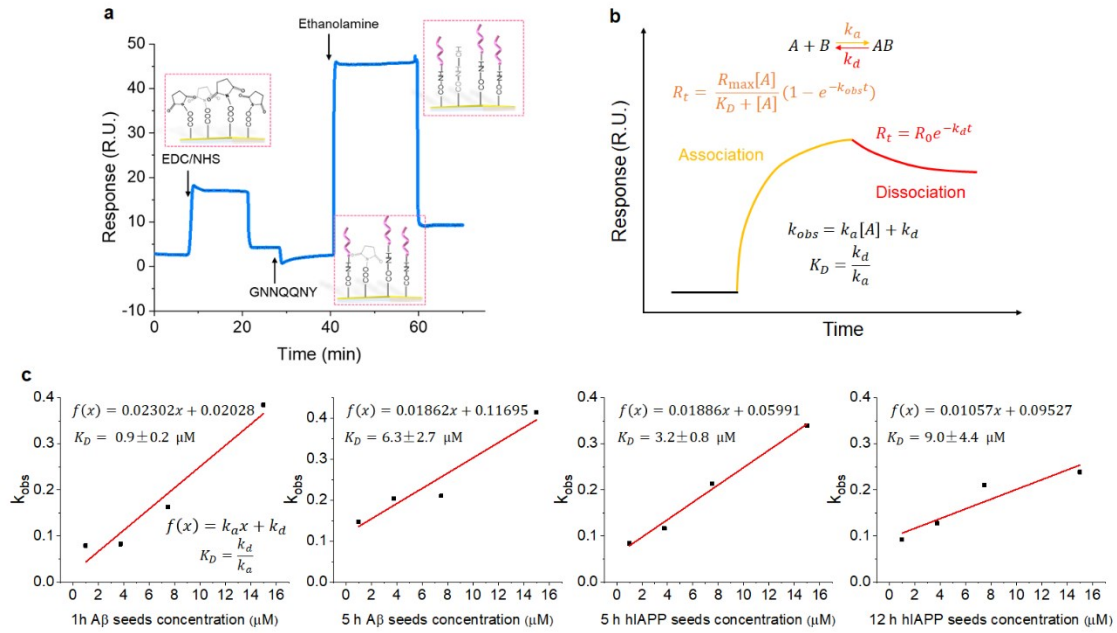

**Figure S5. SPR sensorgram for monitoring binding affinity of GNNQQNY to A $\beta$  or hIAPP seeds.** (a) Representative SPR sensorgram to demonstrate the immobilization of GNNQQNY onto a gold chip via the EDC/NHS coupling method. (b) Schematic illustration to show the association and dissociation sensorgram phases and to determine association constant ( $k_a$ ), dissociation constant ( $k_d$ ), and binding constant ( $K_D = k_d/k_a$ ) based on the Langmuir model. (c) Fitting the binding curves at different A $\beta$ /hIAPP concentrations.

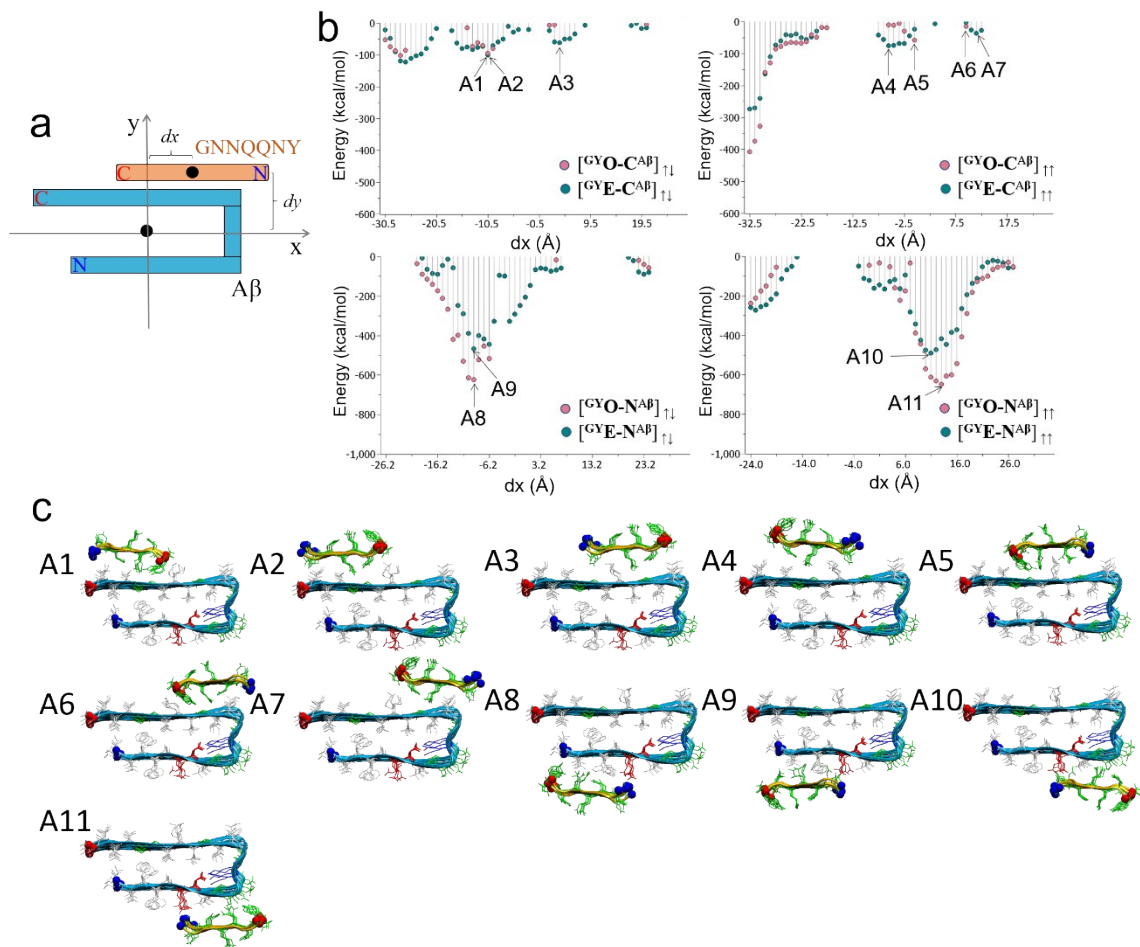

**Figure S6. Interfacial scanning to determine the double-layer GNNQQNY-A $\beta$  cross-seeding assemblies at the low energy states using an in-house peptide-packing program.** (a) Interfacial scanning procedure for searching all possible cross-seeding interfaces between GNNQQNY and A $\beta$ . (b) Packing energy profiles of all possible GNNQQNY-A $\beta$  interfaces by considering four key parameters of interlayer translation ( $d_x$ ), interlayer distance ( $d_y$ ), layer-to-layer orientation (parallel vs. antiparallel), and interfacial sidechain contacts (even face vs. odd face of GNNQQNY). (c) Molecular structures of eleven double-layer GNNQQNY-A $\beta$  assemblies at the low energy states, as selected from b.



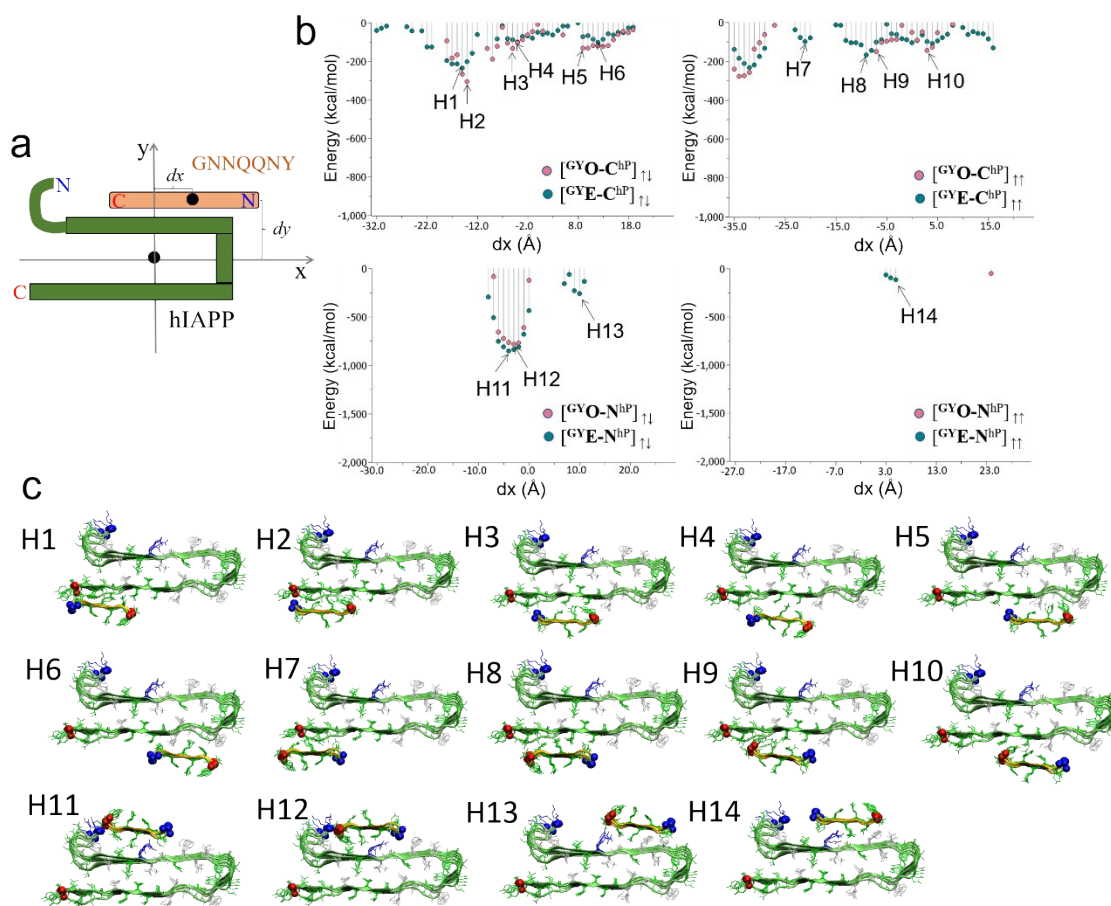

**Figure S7. Interfacial scanning to determine the double-layer GNNQQNY-hIAPP cross-seeding assemblies at the low energy states using an in-house peptide-packing program. (a)** Interfacial scanning procedure for searching all possible cross-seeding interfaces between GNNQQNY and hIAPP. **(b)** Packing energy profiles of all possible GNNQQNY-hIAPP interfaces by considering four key parameters of interlayer translation ( $d_x$ ), interlayer distance ( $d_y$ ), layer-to-layer orientation (parallel vs. antiparallel), and interfacial sidechain contacts (even face vs. odd face of GNNQQNY). **(c)** Molecular structures of fourteen double-layer GNNQQNY-hIAPP assemblies at the low energy states, as selected from **b**.

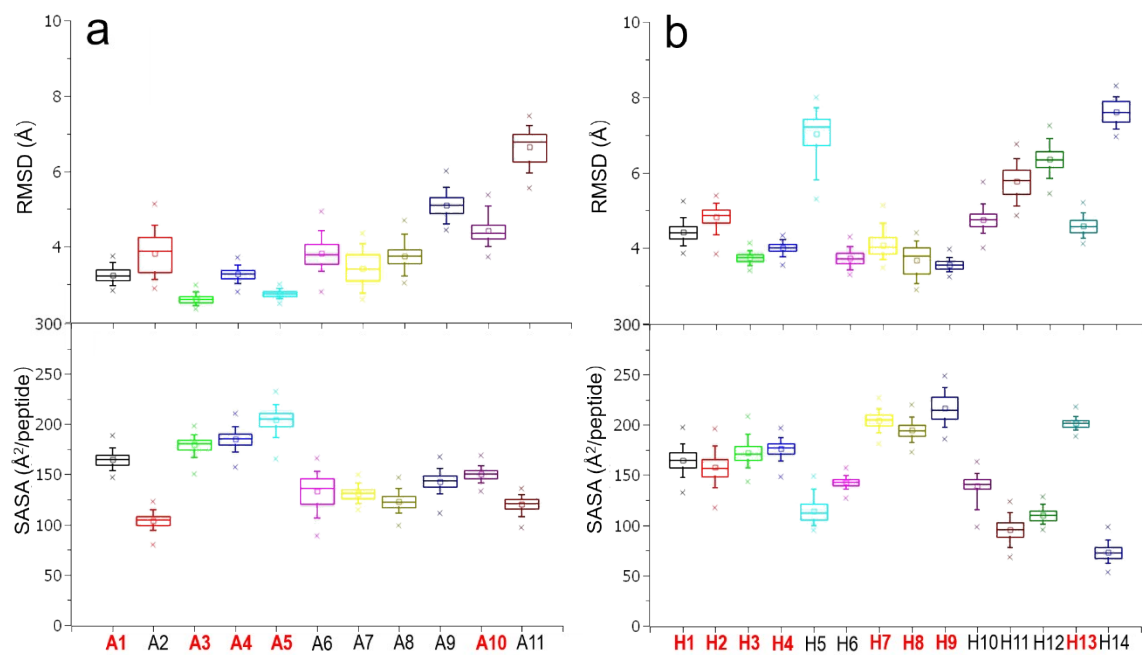

**Figure S8. Structural and interfacial characterization of double-layer cross-seeding assemblies.** RMSD and SASA values for (a) GNNQQNY-A $\beta$  and (b) GNNQQNY-hIAPP assemblies as calculated from the last 25 ns trajectories. The systems with the lower RMSD and the higher SASA are initially selected as the most possible double-layer assemblies, leading to A1, A3, A4, A5 and A10 for GNNQQNY-A $\beta$  and H1, H2, H3, H4, H7, H8, H9 and H13 for GNNQQNY-hIAPP.

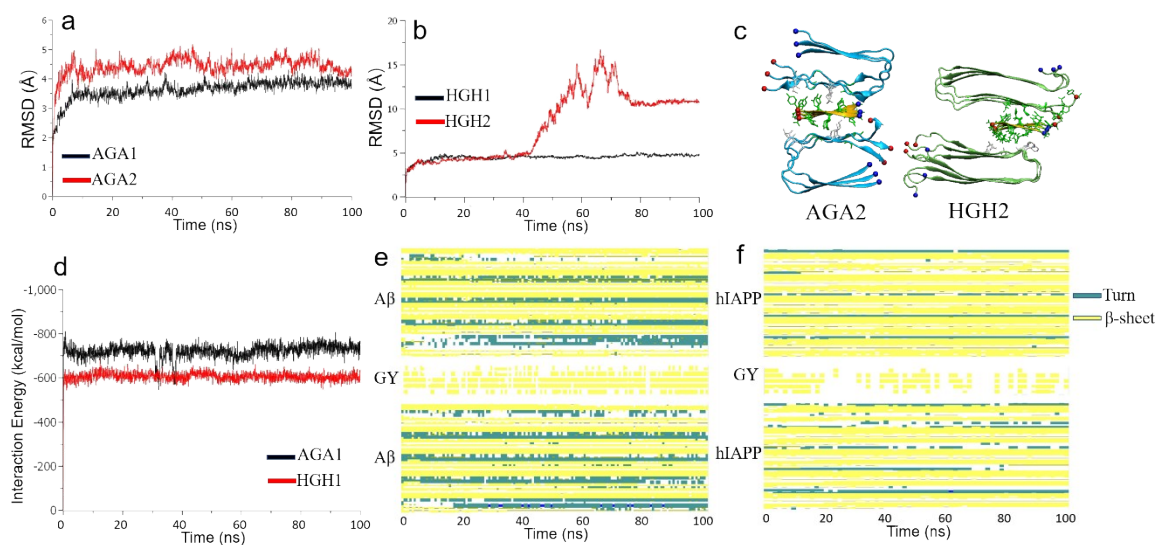

**Figure S9. Structural and interfacial characterization of triple-layer cross-seeding assemblies.** Time-dependent RMSD curves for (a) A $\beta$ -GNNQQNY-A $\beta$  (AGA1, AGA2), (b) hIAPP-GNNQQNY-hIAPP (HGH1, HGH2). (c) Representative MD snapshots of AGA2 and HGH2 assemblies, which are less stable than AGA1 and HGH1 assemblies. (d) Nonbonded interaction energies and (e-f) the secondary structures of AGA1 and HGH1 assemblies reveal strong interfacial interactions and highly stable secondary structures.

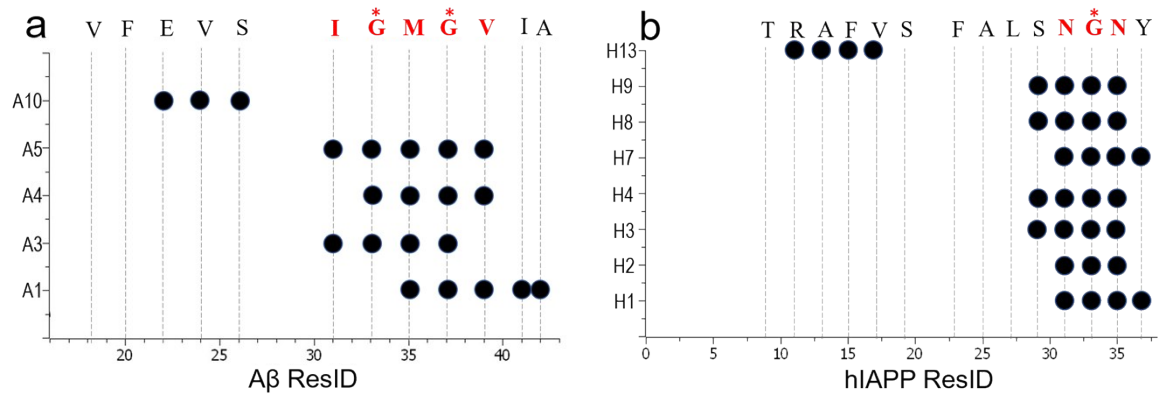

**Figure S10.** Interfacial residue contacts between double-layer (a) GNNQQNY-A $\beta$  and (b) GNNQQNY-hIAPP assemblies.

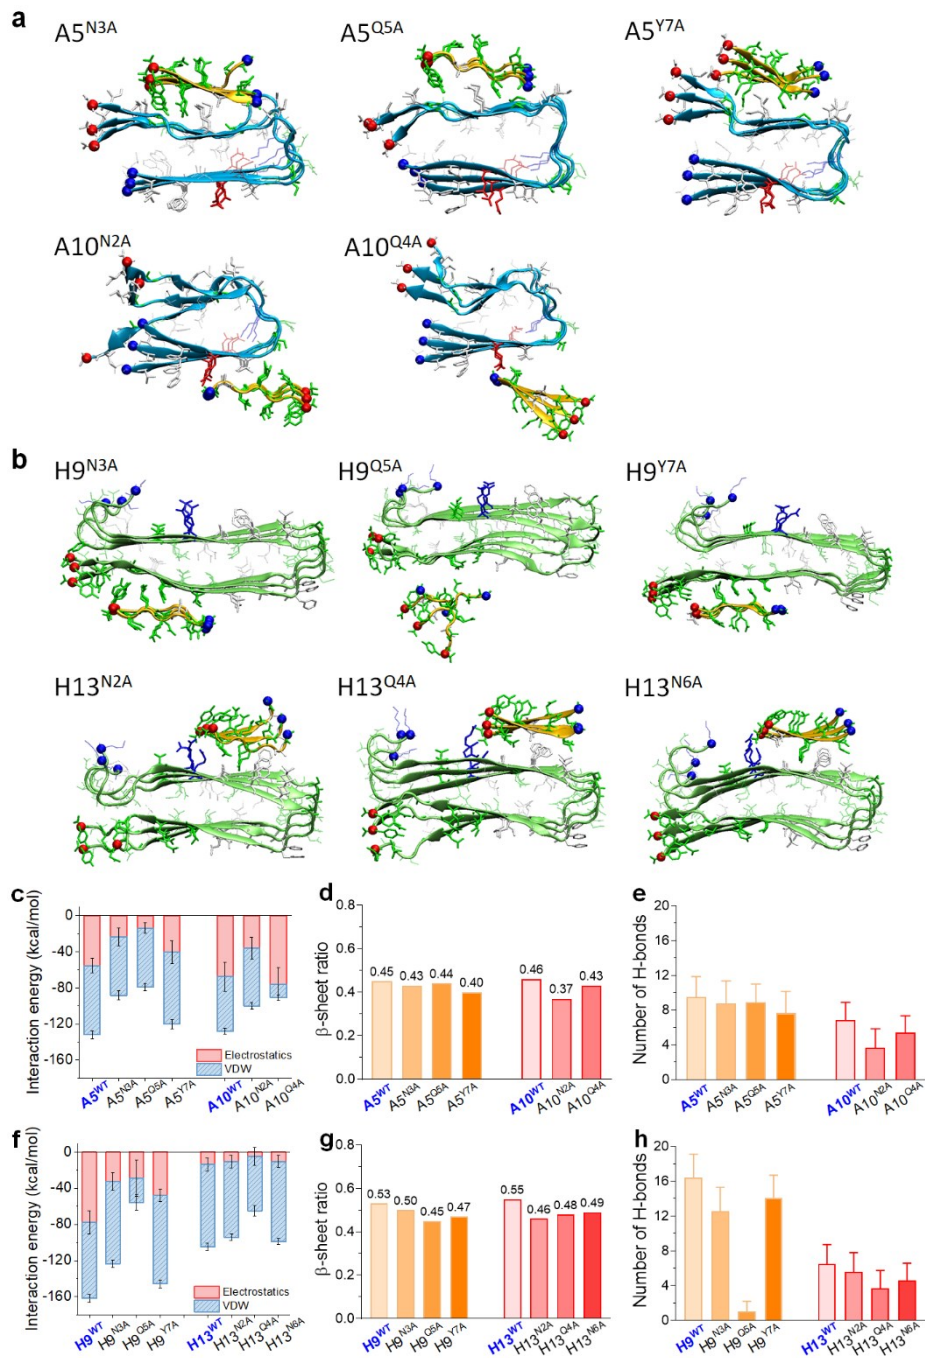

**Figure S11. Structural and interfacial characterization of cross-seeding of GNNQQNY mutants with A $\beta$  or hIAPP.** Final molecular structures of cross-seeding of different GNNQQNY mutants with (a) A $\beta$  in A5 and A10 models and (b) hIAPP in H9 and H13 models. Comparison of (c, f) nonbonded interaction energy, (d, g)  $\beta$ -sheet ratio, (e, h) number of hydrogen bonds between (c, d, e) wild type and mutants of GNNQQNY-A $\beta$  assemblies and (f, g, h) wild type and mutants of GNNQQNY-hIAPP assemblies. All values in (c-h) are obtained and averaged from the last 20-ns MD simulations.

## References
